23 different bacterial donors within “Sifarchaeota” MAGs, which hypothetically expanded  
24 “Sifarchaeota” capacities for substrate utilization, energy production and niche adaptation.

25

## 26 **Introduction**

27 Deep marine sediments are the home of multiple poorly described archaeal lineages, most  
28 of which are yet uncultured (1)(2). Recently, the discovery of Asgard archaea in benthic  
29 environments has generated great interest in novel lineages from marine sediments. Additionally,  
30 greater attention directed towards studying Asgard archaea is also in part to understanding  
31 eukaryogenesis, as this superphylum harbors the most closely related archaeal group to  
32 eukaryotes and their genomes encode for multiple homologs of eukaryotic proteins (3)(4). So far,  
33 there are 6 established Asgard phyla: Lokiarchaeota, Thorarchaeota, Odinararchaeota,  
34 Heimdallarchaeota, Helarchaeota and Gerdarchaeota (4)(5)(6). The number of novel lineages yet  
35 to be found is at this point unknown. This raises the need for more genome resolved metagenome  
36 surveys to recover genomes of these archaeal lineages, decipher their metabolic capacities and  
37 place them in the context of microbial ecology. Previous studies targeting the deep sediment  
38 from the Costa Rica (CR) margin seafloor have shown the presence of diverse archaeal  
39 communities (7)(8). Among these archaeal lineages, members of Asgard superphyla were highly  
40 abundant at multiple depths, making up 17% of the archaeal communities present (7)(8). In this  
41 study on the Costa Rica margin seafloor, we employ genome resolved metagenomics to  
42 describe the metabolic potential of the genomes belonging to a new Asgard phylum.  
43 Phylogenomic analysis placed the sequences of the new Asgard genomes as a sister clade to the  
44 sequences of Thorarchaeota and we propose the name “Sifarchaeota” to describe this new  
45 Asgard phylum. Comparative analysis shows distinct differences between Sifarchaeota and

46 previously reported Asgard archaea in terms of substrate utilization, energy production and niche  
47 adaptation strategies. Finally, we detect multiple potential horizontal gene transfer (HGT) events  
48 from different bacterial donors expanding the substrate utilization, energy production and  
49 secondary metabolite production capacities of the Sifarchaeota.

## 50 **Methods**

### 51 **Sample collection**

52 Samples were collected during International Ocean Drilling Program (IODP) Expedition  
53 334, Site U1379B on the Costa Rican Margin. Details on sample location and sampling  
54 methodology have been previously described (7)(9). Microbiology samples (whole-round cores)  
55 were collected on board and frozen immediately at -80°C. They were shipped to the Gulf Core  
56 Repository (College Station, Texas) on dry ice and stored at -80°C until shipping to the Biddle lab  
57 (Lewes, Delaware) on dry ice and further storage at -80°C. Metagenome sequencing data were  
58 generated from four silty clay sediment horizons (2H-1, 2H-2, 2H-5A, and 2H-5B) in the depth  
59 interval of 2-9 mbsf, within the sulfate reduction zone (7).

### 60 **DNA extraction, library construction and sequencing**

61 DNA for metagenomic sequencing was extracted from ~7 g sediment (~0.7 g sediment in  
62 10 individual lysis tubes) using PowerSoil DNA Isolation Kit (Qiagen) following the  
63 manufacturer's instructions, except for the following minor modification: the lysing tubes were  
64 incubated in water bath of 60°C for 15 min prior to beading beating on a MP machine at speed 6  
65 for 45 seconds. The DNA extracts were iteratively eluted from the 10 spin columns into a final of  
66 100 µL of double distilled H<sub>2</sub>O for further analysis. Metagenomic libraries were prepared and  
67 sequenced (150 bp paired-end) on an Illumina NextSeq 500 sequencer at the Genome Sequencing  
68 & Genotype Center at the University of Delaware.

## 69 **Assembly and genome binning**

70           The raw sequencing data were processed with Trimmomatic v.0.36 (10) to remove Illumina  
71 adapters and low quality reads (“SLIDINGWINDOW:10:25”). The quality-controlled reads from  
72 the eight samples were de novo co-assembled into contigs using Megahit v.1.1.2 (11) with the k-  
73 mer length varying from 27 to 117. Contigs longer than 1000 bp were automatically binned using  
74 MaxBin2 (12) and Metabat2 (13), and the best quality ones were selected using DAS\_Tool (14)  
75 with the default parameters. The resulting MAGs were quality assessed using CheckM (15) and  
76 taxonomically classified using GTDBTk v1.3.0 (16) using the default parameters. Genome bins of  
77 >50% completeness were manually refined using the gbtools (17) based on the GC content,  
78 taxonomic assignments, and differential coverages in different samples. Coverages of contigs in  
79 each sample were determined by mapping trimmed reads onto the contigs using BMap v.37.61  
80 (18). Taxonomy of contigs were assigned according to the taxonomy of the single-copy marker  
81 genes in contigs identified using a script modified from blobology (19) and classified by BLASTn.  
82 SSU rRNA sequences in contigs were identified using Barrnap (Seeman 2015, Github), and  
83 classified using VSEARCH with the SILVA 132 release (20) as the reference.

84           To improve the quality of the two novel Asgard archaea MAGs, we recruited quality-  
85 controlled reads using BMap from 2H-2, because the highest genome coverages of these two  
86 MAGs were detected in this particular sample. The recruited reads were then re-assembled using  
87 SPAdes v.3.12.0 (21) using default parameters. After removal of contigs shorter than 1 kb, the  
88 resulting scaffolds were visualized and re-binned manually using gbtools (17) as described above.  
89 The quality of the resulting Asgard archaea genomes were checked using CheckM v.1.0.7 (15)  
90 with the “lineage\_wf” option.

91

## 92 **Concatenated ribosomal protein phylogeny**

93 To determine the phylogenetic affiliations of the two Sifarchaeota MAGs in the Archaea  
94 domain, we performed a thorough phylogenomic analysis based on the concatenation of 16  
95 ribosomal proteins (L2, L3, L4, L5, L6, L14, L15, L16, L18, L22, L24, S3, S8, S10, S17, and  
96 S19). Reference genomes were selected from all the major archaeal phyla (3-5 for each) included  
97 in the GTDB database (22), except for the Asgard superphylum for which all available genomes  
98 were included. Ribosomal protein sequences were detected in Anvi'o (23) using the respective  
99 HMM profiles, aligned using MUSCLE v3.8.31(24), and concatenated. The maximum likelihood  
100 phylogenetic tree was reconstructed using IQ-Tree (v1.6.6) (25) (located on the CIPRES web  
101 server) (26) with VT + F + R10 as the best-fit substitution model selected by ModelFinder (27),  
102 and single branch location was tested using 1000 ultrafast bootstraps and approximate Bayesian  
103 computation (28). Branches with bootstrap support >80% were marked by black circles. In  
104 addition to phylogenomic analysis, we also calculated the average nucleotide identity (ANI) using  
105 FastANI (29) and average amino acid identity (AAI) using CompareM  
106 (<https://github.com/dparks1134/CompareM>) with default settings between these novel Asgard  
107 MAGs and other public available ones (i.e., those included in the GTDB database), to further  
108 explore the novelty of these MAGs.

## 109 **Metabolic reconstruction**

110 Amino acid sequences encoded by the Sifarchaeota MAGs were predicted using Prodigal  
111 v2.6.3 (30) applying the default parameters and using translation table 11. The resulting amino  
112 acid sequences were screened using HMMsearch tool (31) against custom HMM databases (32)  
113 representing the key genes for specific metabolic pathways to understand the potential metabolic  
114 capacities and their ecological roles of Sifarchaeota. The presence/absence profiles of the

115 metabolic pathways and their completion levels were further assessed through querying the  
116 predicted amino acids against KEGG database using BlastKoala tool (33). Carbohydrate-active  
117 enzymes encoded by the Sifarchaeota MAGs were analyzed using dbCAN-fam-HMMs (v6)  
118 database (34). Proteases, peptidases, and peptidase inhibitors encoded by the MAGS were detected  
119 via USEARCH-ublast tool (35) against the MEROPS database v12.1(36). Finally, the predicted  
120 amino acid sequences were queried against the TCDB database (37) using USEARCH-ublast tool  
121 (35) to identify the potential transporters.

## 122 **Genome centric comparative analysis for the Asgard superphylum**

123 We compared the total metabolic profiles of Sifarchaeota MAGs with representatives from  
124 other Asgard lineages including (Odinarchaeota, Thorarchaeota, Lokiarchaeota and  
125 Heimdallarchaeota) to identify the key metabolic differences between each of the phyla within the  
126 Asgard superphylum. We queried the representative MAGs of each of the Asgard lineages against  
127 KOfam database (KEGG release 94.1) via KofamKOALA webtool (38) and using evaluate  $10^{-3}$ .  
128 Then, the Asgard MAGs were clustered based on the presence/absence profiles of the identified  
129 KOfams, shared between at least 3 genomes, using clustergrammer web-based tool (39) and  
130 applying the Euclidean distance and average linkage type.

## 131 **Horizontal gene transfer (HGT) analysis**

132 The HGT events were detected through querying Sifarchaeota predicted amino acids  
133 against KEGG database (KEGG release 94.1) via GhostKoala web interface (33). Proteins with  
134 KO annotation, non-Asgard hits, and a bit score  $>100$  were considered as potential HGT candidate  
135 proteins. Then, the candidate set of proteins were queried against (nr) and UniProtKB/swissprot  
136 databases and all proteins showing Asgard hits as one of the top hits were removed from any  
137 further analysis. Finally, each candidate protein is aligned to reference set of proteins collected via

138 Annotree (40) using the corresponding KO entry and the HGT events were confirmed through  
139 creating approximately-maximum-likelihood phylogenetic tree for each candidate protein using  
140 FastTree v2.1 (41). An outline for the HGT detection pipeline is illustrated in Supplementary  
141 Figure 1.

142

## 143 **Results**

### 144 **MAG construction and phylogenomic analysis**

145 We reconstructed 3 MAGs belonging to a potentially novel Asgard phylum with moderate  
146 completion levels (67-80%) and very low contamination levels (0.93-1.9%) (Table 1). The  
147 taxonomic affiliations of these potentially novel Asgard MAGs were tested using 16 ribosomal  
148 proteins phylogenomic tree and it showed that both MAGs clustered together and formed a sister  
149 lineage to MAGs belonging to the phylum Thorarchaeota (Figure 1). The phylogenetic analysis  
150 using a set of 122 archaea specific marker proteins implemented in GTDB-tk confirmed that these  
151 MAGs are belonging to a potentially novel Asgard archaeal lineage. To confirm the unique  
152 positions of these candidate novel Asgard lineage, we calculated the average nucleotide identities  
153 (AAI) and average amino acid identities (ANI) between the 3 novel Asgard MAGs and other  
154 MAGs representing the other Asgard lineages including (Lokiarchaeota, Thorarchaeota,  
155 Heimdallarchaeota and Odinararchaeota). On average, the 3 novel Asgard MAGs showed low AAI  
156 values when compared to the other Asgard MAGs (<50%) (Supplementary Tables 1 and 2).

157 Two of the new Asgard MAGs, bins 190 and 142, showed a very high similarity with AAI  
158 98.81% and ANI 99.52%, as such, we focused all our subsequent analysis on two MAGs, bins 042  
159 and 142, since they were the most complete and unique MAGs in this study.

160

161 **Description of the taxa**

162 Although the two Sifarchaeota MAGs, bin042 and bin142, shared many metabolic  
163 similarities, we could not describe them using one type strain due to the significant phylogenetic  
164 distances between the two MAGs (Figure 1) and the genomic differences as described using ANI  
165 and AAI values (Supplementary Tables 1 and 2). Therefore, we used two type strains to describe  
166 the two putative Sifarchaeota lineages.

167 *Candidatus* Sifarchaeotum costaricensis (**costaricensis of or from Costa Rica**). Type material is  
168 the genome designated as bin042 representing ‘*Candidatus* Sifarchaeotum costaricensis’.

169 *Candidatus* Sifarchaeotum subterraneus (**subterraneus latin name of subsurface**). Type material  
170 is the genome designated as bin142 representing ‘*Candidatus* Sifarchaeotum subterraneus’.

171 Based on these genera, we further propose the name of a new Asgard phylum, the phylum  
172 ‘*Candidatus* Sifarchaeota phylum nov.’

173 **Metabolic reconstruction of Sifarchaeota MAGs showed remarkable saccharolytic capacities**  
174 **and potential anaerobic methylotrophy**

175 Previous reports showed that Asgard genomes encode for wide range of protein and fatty  
176 acids degradation capacities (42). So far, most of the known Asgard genomes showed limited  
177 saccharolytic capacities emphasized by their low genomic densities of CAZymes and sugar  
178 transporters. However, Sifarchaeota showed high abundance and diversity of Carbohydrate Active  
179 Enzymes (CAZymes) encoded by their MAGs specifically targeting sugars varying in  
180 complexities from low (C1-C3) to moderate (C4-C6), including mono-, di- and oligo- saccharides  
181 (Supplementary Figure 1, Supplementary Tables 3 and 5). Interestingly, CAZyme analysis  
182 revealed the presence of different glycoside hydrolases (GH) families including cellulases and  
183 endoglucanases (GH5 and GH9), cyclomaltodextrinase (GH13),  $\alpha$ -glucosidase (GH63),  $\beta$ -1,4-



184 mannoooligosaccharide phosphorylase (GH130) and  $\beta$ -L-arabinofuranosidase (GH142) targeting  
185 cellobiose, maltose and maltooligosaccharides, alpha-glucosaccharides, glucose/mannose and  
186 arabinosaccharides, respectively. We also identified dedicated sugar transporters mediating the  
187 transfer of these sugars inside the Sifarchaeota cells, where the degradation and fermentation  
188 processes take place (Supplementary Table 6). Metabolic reconstruction of Sifarchaeota MAGs  
189 predict a general fermentative anaerobic life style with multiple anaerobic respiration capabilities  
190 emphasized by the presence of incomplete reverse TCA cycle, presence of various fermentation  
191 pathways capable of producing different fermentative products including acetate, acetoin and  
192 butanediol under strictly anaerobic conditions as well as the potential capabilities to anaerobically  
193 respire sulfate to sulfite and nitrite to ammonia. Notably, the degradation capacities for proteins,  
194 peptides and amino acids as well as amino acid metabolism are limited in Sifarchaeota compared  
195 to the other benthic archaea. Hence, Sifarchaeota may make up the short supply of fixed nitrogen  
196 via reducing nitrite to ammonia and encoding for amidases to extract fixed nitrogen from nitrogen  
197 containing amides like formamide.

198 Sifarchaeota MAGs showed the capacity to utilize various C1 compounds including formate  
199 and methanol. For example, methanol is metabolized using an anaerobic methylotrophy pathway  
200 previously described (8), suggesting the potential widespread distribution of this pathway among  
201 benthic marine archaea to metabolize methylated compounds. This potential anaerobic  
202 methylotrophic capacity was inferred via detecting incomplete methylotrophic methanogenesis  
203 pathway, where the key genes encoding for the methyl coenzyme reductase complex were  
204 completely absent. Besides, genes for incomplete Wood Ljungdahl (WL) pathway were identified,  
205 where only the genes of the carbonyl branch were present and the genes of the methyl branch were  
206 completely absent. Detecting these set of genes in Sifarchaeota MAGs suggests the presence of

207 anaerobic methylotrophic capability, enabling Sifarchaeota to recycle methyl groups within  
208 methanol and other methylated compounds. Then, these methyl groups are transferred to  
209 tetrahydrofolate complex replacing the function of the methyl branch of WL pathway and  
210 ultimately producing acetyl CoA.

## 211 **Comparative genomic analyses between different Asgard lineages shows diverse metabolic** 212 **features and life style patterns**

213 To understand the key metabolic differences between the Asgard lineages, we conducted a  
214 comprehensive genome-centric analyses. As described in the methods section, we parsed 13  
215 different MAGs (2 MAGs obtained from this study and 11 publicly available MAGs) belonging  
216 to 5 different Asgard phyla (Lokiarchaeota, Thorarchaeota, Heimdallarchaeota, Odinararchaeota and  
217 Sifarchaeota) against KOfam database using an HMM search tool (Supplementary Table 7. The  
218 analysis output focused on two aspects (1) exploring the range of life style diversity within the  
219 Asgard superphylum and (2) comparing the metabolic capabilities of different Asgard lineages.

220 Overall, the comparative analyses grouped the Asgard superphylum into 4 distinct clusters  
221 based on their whole metabolic profiles. Notably, all the MAGs within the Asgard superphylum  
222 suggested a similar fermentative anaerobic life styles, where the core genes for reverse TCA cycle,  
223 various fermentation pathways were present as well as the absence of oxidative phosphorylation  
224 and oxygen tolerance related genes. Here we describe the clusters and the features that drive their  
225 clustering.

226 The **first cluster** grouped the 2 Sifarchaeota MAGs (bin42 and 142), obtained from this  
227 study, with Candidatus Odinararchaeota archaeon LCB4. Sifarchaeota MAGs shared multiple  
228 metabolic similarities with the Odinararchaeota MAGs including limited amino acid and fatty acids  
229 metabolic potentials, evident saccharolytic activities, emphasized by high density of CAZyme

230 encoding genes targeting different mono-, di- and oligosaccharide. Also, we could only identify  
231 genes encoding for the oxidative branch of the pentose phosphate pathway, producing  
232 Phosphoribosyl pyrophosphate (PRPP), which eventually channeled to the purine and pyrimidine  
233 metabolic pathways to be used for nucleotide and nucleic acid biosynthesis. Also, MAGs within  
234 this cluster encoded for large number of genes involved in C1 metabolism including formate,  
235 methylamines and methanol. Genes encoding for formate dehydrogenase, methanol and  
236 methylamine specific corrinoid protein:coenzyme M methyltransferases were present, which  
237 suggest the potential capability of both lineages to utilize formate, methylamines and methanol as  
238 carbon sources, respectively.

239         The **second cluster** grouped Lokiarchaeota and Thorarchaeota MAGs together. Unlike the  
240 previous cluster, MAGs belonging to that cluster are characterized by their proteins and peptide  
241 degrading capabilities emphasized by the presence of high number of proteases and peptidases  
242 encoding genes ranging in density from (126-193 proteins/Mbs) and belonging to different  
243 families of serine and metalloproteases. Unlike other Asgard groups, Thorarchaeota and  
244 Lokiarchaeota showed the capacities to synthesize different amino acids including nonpolar amino  
245 acids (e.g. isoleucine, leucine, valine and alanine), aromatic amino acids (e.g. tryptophan and  
246 phenylalanine) via the shikimate pathway and charged amino acids (e.g. glutamate and lysine).  
247 Similar to other Asgard archaea, MAGs belonging to Thor- and Loki- archaeota encoded for genes  
248 mediating the metabolism of C1 compounds (e.g. formate), however, the absence of  
249 methyltransferases encoding genes excluded the use methylated compounds as one of the potential  
250 substrates.

251         Finally, **the third and fourth clusters** included different Heimdallarchaeota MAGs. The  
252 separation between Heimdallarchaeota based on their metabolic profiles suggests the presence of

253 fundamental metabolic differences between the members of Heimdallarchaeota phylum and  
254 supports the previous findings that described Heimdallarchaeota as a polyphyletic group (3)(6).  
255 This raises the need for wider sampling efforts targeting Heimdallarchaeota genomes to fully  
256 resolve their phylogenetic position and evolutionary history. However, in this study we grouped  
257 all the Heimdallarchaeota MAGs and treated them as one phylum and designed a model that  
258 highlights the difference between them and the other Asgard lineages. Notably, all  
259 Heimdallarchaeota MAGs showed the capacity to utilize proteins and short chain fatty acids as  
260 carbon sources, while polysaccharide degradation was less supported. Similar to Loki- and  
261 Throarchaeota MAGs, Heimdallarchaeota MAGs encoded for high number of peptidases with  
262 coding densities (110-210 proteins/Mbs) and belonging to diverse families of proteases and  
263 peptidases including serine, metallo, cysteine and threonine peptidases (Supplementary Table 3).  
264 Also, Heimdallarchaeota MAGs showed the capacity to metabolize and synthesize nonpolar amino  
265 acids (e.g. alanine, glycine, and threonine). Among all the Asgard MAGs included in this analysis,  
266 only Heimdallarchaeota MAGs encoded for enzymes mediating beta-oxidation pathway including  
267 acyl CoA dehydrogenase, enoyl CoA hydratase and hydroxyacyl CoA dehydrogenase, suggesting  
268 their potential to use short-chain fatty acids (SCFA) as carbon and energy sources. Similar to all  
269 other Asgards, Heimdallarchaeota encoded for incomplete WL pathway, which could have a role  
270 in metabolizing C1 compounds like formate and formaldehyde.

271         Due to the limited access to the surrounding microbial community composition and  
272 environmental conditions as well as the underrepresentation of the some of the lineages (only 1  
273 MAG from Odinararchaeota), we could not assess the exact reasons for these diverse substrate  
274 preferences between the Asgard phyla (e.g. polysaccharides in Sifarchaeota, proteins in Thor- and  
275 Loki-archaeota and short-chain fatty acids in Heimdallarchaeota). Also, we are unable to conclude

276 at this point if these findings could be generalized for all the members within each phylum or it is  
277 just limited to the lineages/MAGs included in the study.

278 **Role of horizontal gene transfers (HGT) in enhancing Sifarchaeota metabolic capacities and**  
279 **niche adaptations**

280 We investigated the role of HGT in expanding the metabolic capacities, substrate  
281 utilization and niche adaptation of the Sifarchaeota phylum. We traced the origin of each HGT  
282 event and identified the extent of the spread of each gene within the Asgard superphylum  
283 (Supplementary Figure 2). We successfully identified a total of 65 HGT events in Sifarchaeota, 12  
284 (0.65% of the total proteins) and 53 (1.34% of the total proteins) events in bin042 and bin142,  
285 respectively. Most likely, the majority of the identified HGT events were lineage specific (58,  
286 89.2%) and only few similar events were detected in other Asgard lineages (7, 11.8%). Also, we  
287 identified the potential donors for most of the horizontally transferred genes, ~90% of which were  
288 of bacterial origins. The major bacterial contributors for the horizontally transferred genes were  
289 Firmicutes (~30%), Chloroflexi (~15%), Proteobacteria (~13%), Cyanobacteria (5%) and other  
290 bacterial lineages (~30%). Only a small fraction (~10%) of the horizontally transferred genes were  
291 of archaeal origin outside of the Asgard superphylum (Figure 5 and Supplementary Table 8).

292 We classified HGT events based on the how widespread the transferred genes were among  
293 the different Asgard phylum, as well as other archaeal lineages. Accordingly, the HGT events were  
294 classified into lineage-specific, phylum-specific and domain-wide events. In the lineage specific  
295 event, the closest relatives of the transferred genes were bacteria and the genes were exclusively  
296 found in Sifarchaeota MAGs and no orthologs were found in other Asgard or any other archaeal  
297 phyla (e.g. butanediol dehydrogenase). In the phylum-specific event, the closest relatives of the  
298 transferred genes were bacteria and the genes were found in multiple Asgard phyla (e.g. enoyl

299 CoA hydratase). In the domain wide event, the closest relatives of the transferred genes were  
300 bacteria and the genes were found in different archaeal phyla (e.g. arsenate reductase *arsC*  
301 thioredoxin) (Figure 5). In general, the functional annotation of the transferred genes showed that  
302 these genes are involved in augmenting the Sifarchaeota metabolic repertoire. The majority of the  
303 transferred genes fall within two metabolic modules: butanoate metabolism and biosynthesis of  
304 secondary metabolites. In the butanoate metabolism, the majority of transferred genes were  
305 encoding for butane diol dehydrogenases and glutaconate CoA-transferase subunits mediating the  
306 key steps in pyruvate and acetate formation from butane diol and hydroxy glutaryl CoA,  
307 respectively.

308         While the majority of the genes involved in the biosynthesis of secondary metabolites  
309 were part of the porphyrin and chlorophyll metabolism and terpenoid biosynthesis (e.g.  
310 anaerobic magnesium-protoporphyrin IX monomethyl ester cyclase and 1,4-dihydroxy-2-  
311 naphthoate polyprenyltransferase). Interestingly, multiple genes involved in niche adaptation  
312 may be acquired from the surrounding bacterial communities. These genes including  
313 formamidase and MtaA/CmuA family methyltransferase which potentially enable Sifarchaeota  
314 to utilize amide containing compounds and methylated compounds as nitrogen and carbon  
315 sources, respectively. Also, a gene encodes for arsenate reductase was potentially acquired from  
316 candidate division KSB1 bacterium, potentially allowing Sifarchaeota to use arsenate containing  
317 compounds as final electron acceptors.

## 318 **Discussion**

319         In this study, we recovered three MAGs from deep Costa Rica sediments belonging to a new  
320 Asgard phylum, forming a sister clade to MAGs belonging to Thorarchaeota. We propose the name  
321 Sifarchaeota for this phylum, named after the Norse goddess, Sif, wife of Thor. Putative collective

322 metabolic profiles of the Sifarchaeota MAGs showed remarkable differences in the life style and  
323 niche adaptations compared to the other Asgard members. We predict a saccharolytic,  
324 fermentation-based life style with limited amino acid and fatty acid metabolism, whereas most of  
325 the Asgard archaea identified before this study were known for their peptide degradation and short  
326 chain fatty acid oxidation capacities (3)(5)(42). We detected genes encoding for incomplete  
327 methanogenesis pathways coupled with the carbonyl branch of WL pathway suggesting the  
328 capability of Sifarchaeota to perform anaerobic methylotrophy enabling the utilization of various  
329 methylated compounds (e.g. methanol and methylamines). The widespread of anaerobic  
330 methylotrophy in multiple benthic archaea highlights the importance of this pathway as an  
331 effective strategy to utilize various methylated compounds commonly encountered in the marine  
332 sediment niches (8)(43). On the other hand, Sifarchaeota MAGs shared similar potential  
333 biogeochemical functions with other Asgard archaea including the presence of nitrite reductase  
334 (*nirBD*) genes, putatively enabling Sifarchaeota members to reduce nitrite to ammonia as well as  
335 genes encoding for sulfate adenylyltransferase (*sat*) and phosphoadenosine phosphosulfate  
336 reductase (*cysH*), signifying their putative capability to perform assimilatory sulfate reduction and  
337 sulfate activation. These shared characteristics between Asgard genomes confirm the significant  
338 roles of different Asgard lineages in nitrogen and sulfur biogeochemical cycles in marine sediment  
339 environments.

340 We also gauged the role of HGT in shaping the evolution of Sifarchaeota. Our analysis  
341 suggests that HGT events either added novel genes to the Sifarchaeota pangenome that impart new  
342 functions e.g. butanoate metabolism and biosynthesis of secondary metabolites or enabled the  
343 utilization of alternative non-organic compounds as electron source e.g. arsenate reductase.  
344 Moreover, we explored the range of horizontally transferred gene donors and we concluded that

345 HGT is not limited to a specific phylogenetic group and probably acquired from the surrounding  
346 bacterial communities, normally present in deep marine sediments. Finally, 91% of HGT events  
347 are Sifarchaeota lineage specific and probably took place relatively recently during the course of  
348 evolution, after the diversification of Sifarchaeota from the other Asgard lineages. We identified  
349 only 9% of the events happened earlier to the full diversification of Sifarchaeota from other  
350 Asgards, as well as other archaeal lineages. This could be a plausible explanation for the presence  
351 of shared functions of non-archaeal origin between most of Asgard lineages.

352

### 353 **Acknowledgements**

354

355 We would like to thank the shipboard scientists and crew of IODP Expedition 334 for  
356 collecting these sediments, and the shorebased curators of the Gulf Coast Repository for their  
357 faithful stewardship of precious frozen subsurface samples. We also want to thank our high-  
358 performance computation cluster administrator, Karol Miaskiewicz, for his tireless work. This  
359 work was supported by the WM Keck Foundation award to JFB.



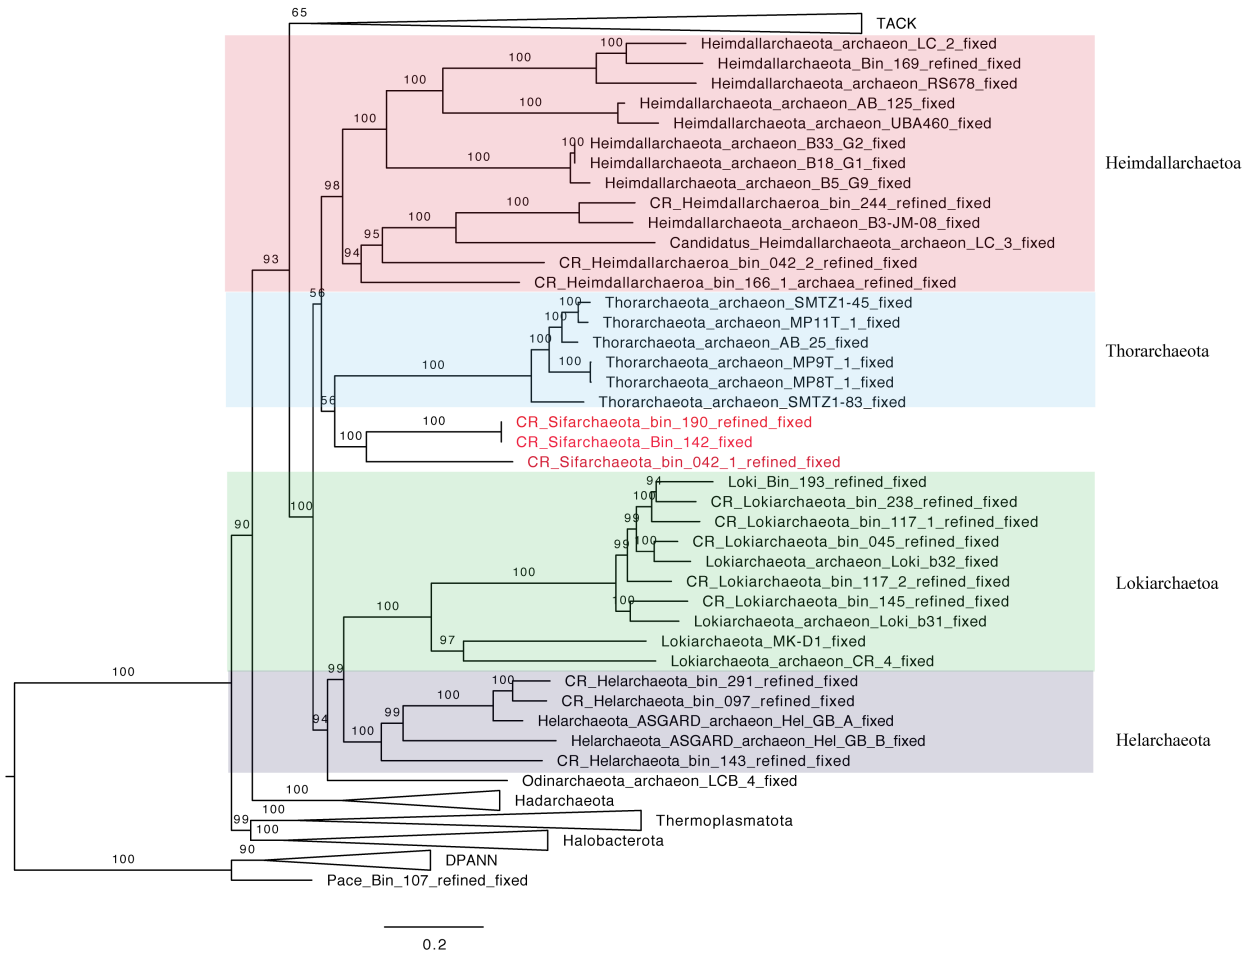

360

361 **Figure 1. Maximum-likelihood phylogenetic tree of archaea genomes based on**  
362 **concatenated 16 ribosomal proteins.** This tree was inferred using IQ-TREE v1.6.10 with the  
363 LG+R7 model and 1000 ultrafast bootstraps. The Sifarchaeota MAGs recovered in this study is  
364 highlighted in red. Lineages of the Asgard superphylum are expanded, while the other lineages  
365 were collapsed, if possible. The scale bar shows estimated sequence substitutions per residue.

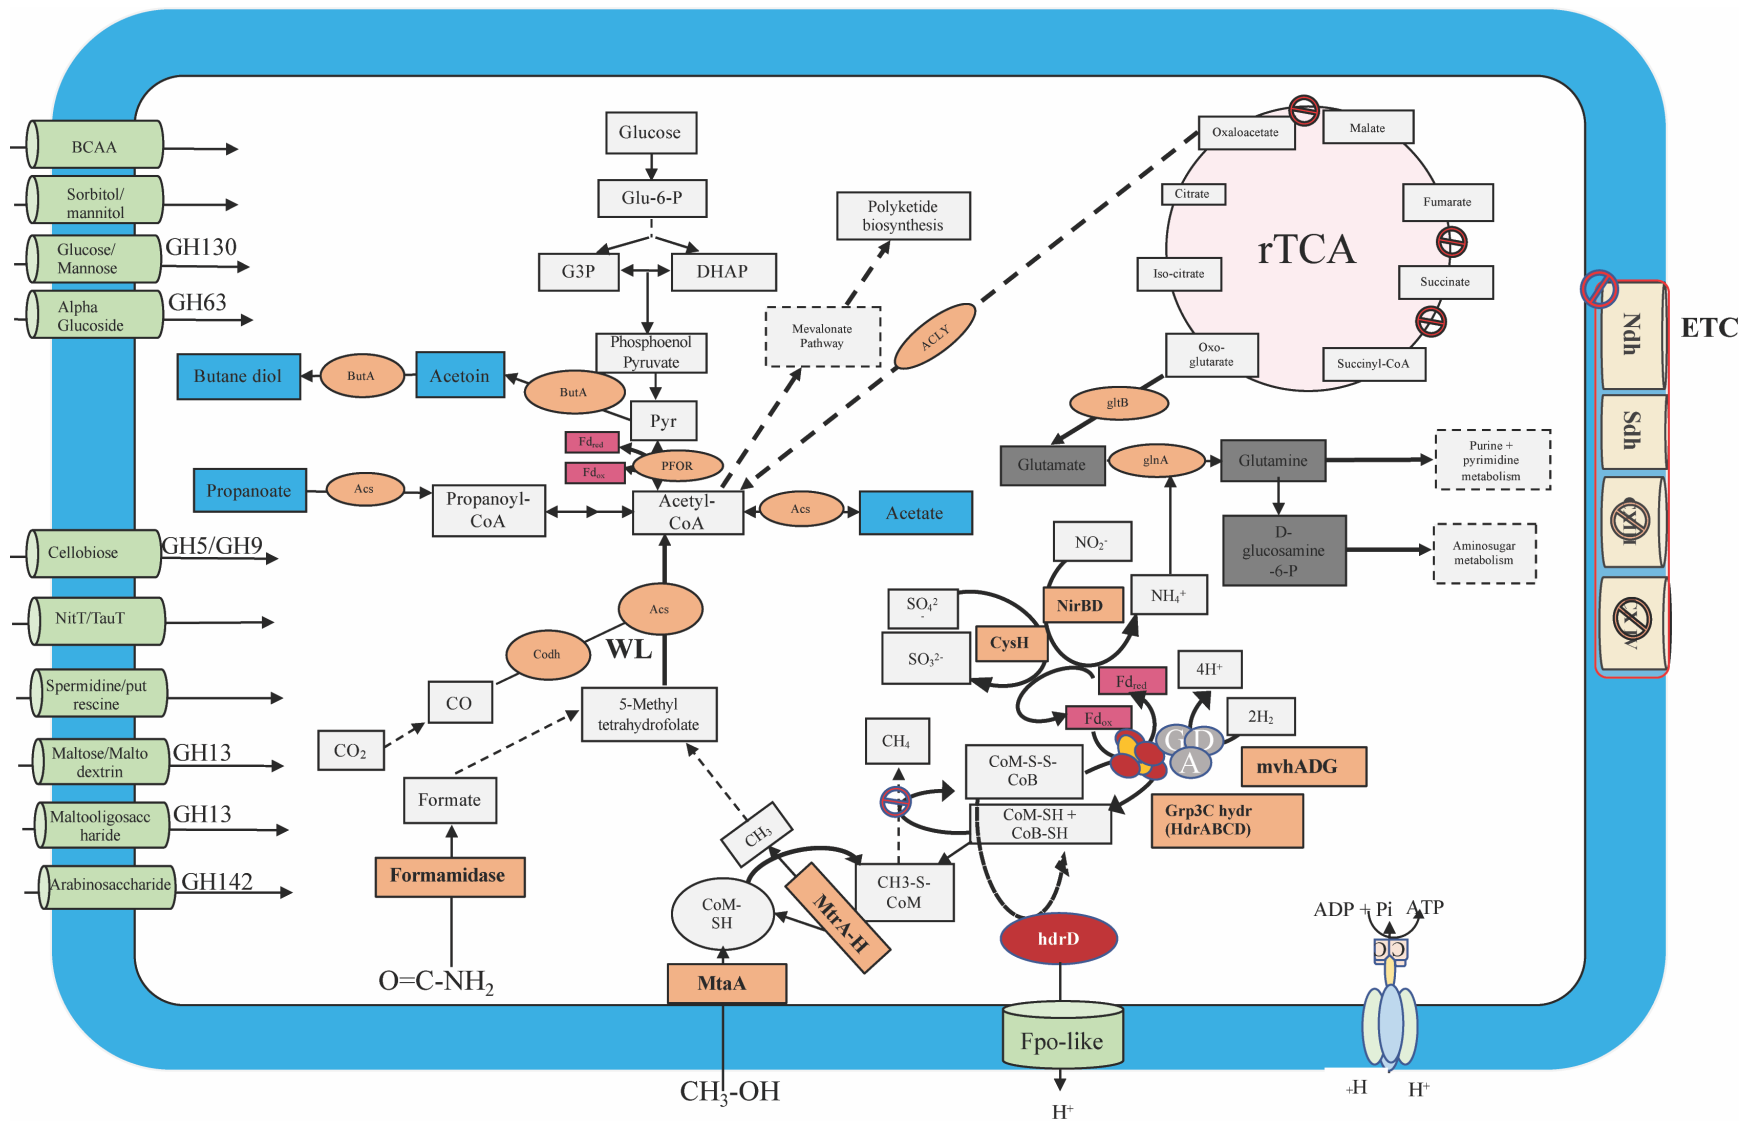

**Figure 2. Metabolic reconstruction of the key metabolic pathways encoded by the Sifarchaeota MAGs.** Central metabolic pathways are shown in gray boxes, carbon fixation pathways (WL and rTCA cycles) are shown in pink, electron transport chain (ETC) proteins are shown in yellow, fermentation products are shown in blue boxes, enzymes and enzyme complexes are shown in orange circles, energy carriers are shown in red, and metabolite and amino acid transporters are shown in light green.

(A)

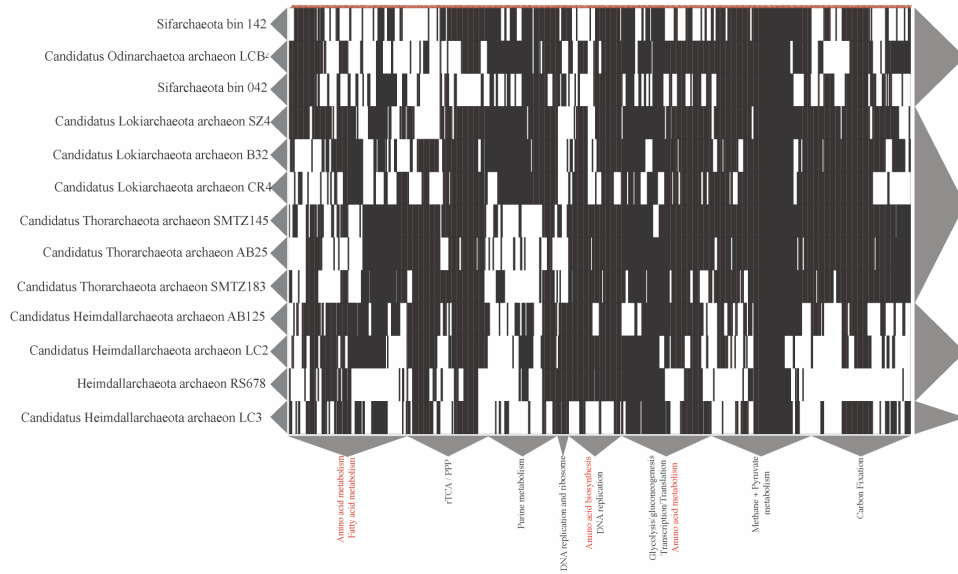

(B)

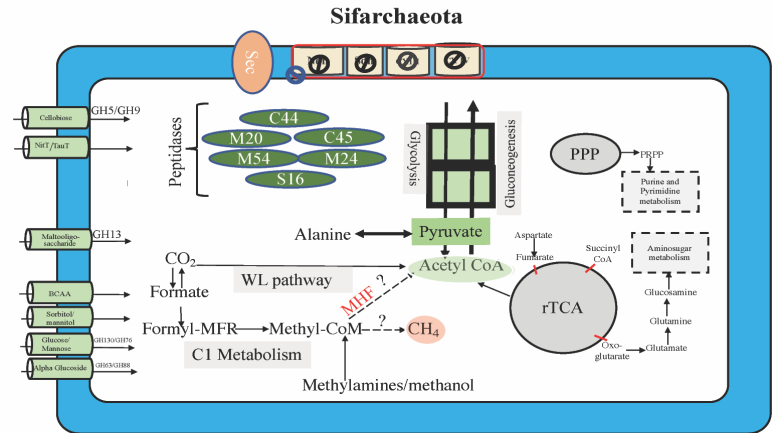

(C)

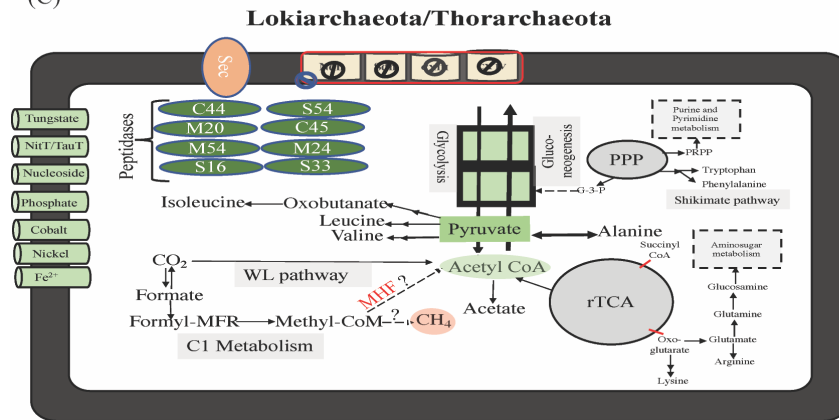

(D)

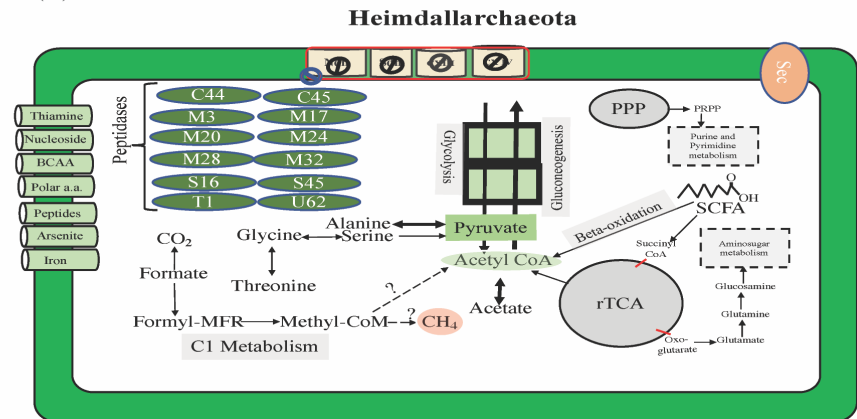

**Figure 3. Comparative analysis between MAGs representing different Asgard members** (A) Heatmap clustering the different Asgard MAGs (X-axis) based on their total metabolic profiles as predicted by Kofam database (Y-axis). The clustering was performed using Euclidean distance and complete linkage methods. (B) Metabolic model illustrates the key metabolic features identified in Sifarchaeota cluster. (C) Metabolic model illustrates the key metabolic features identified in Lokiarchaeota and Thorarchaeota cluster. (D) Metabolic model illustrates the key metabolic features identified in Heimdallarchaeota clusters.

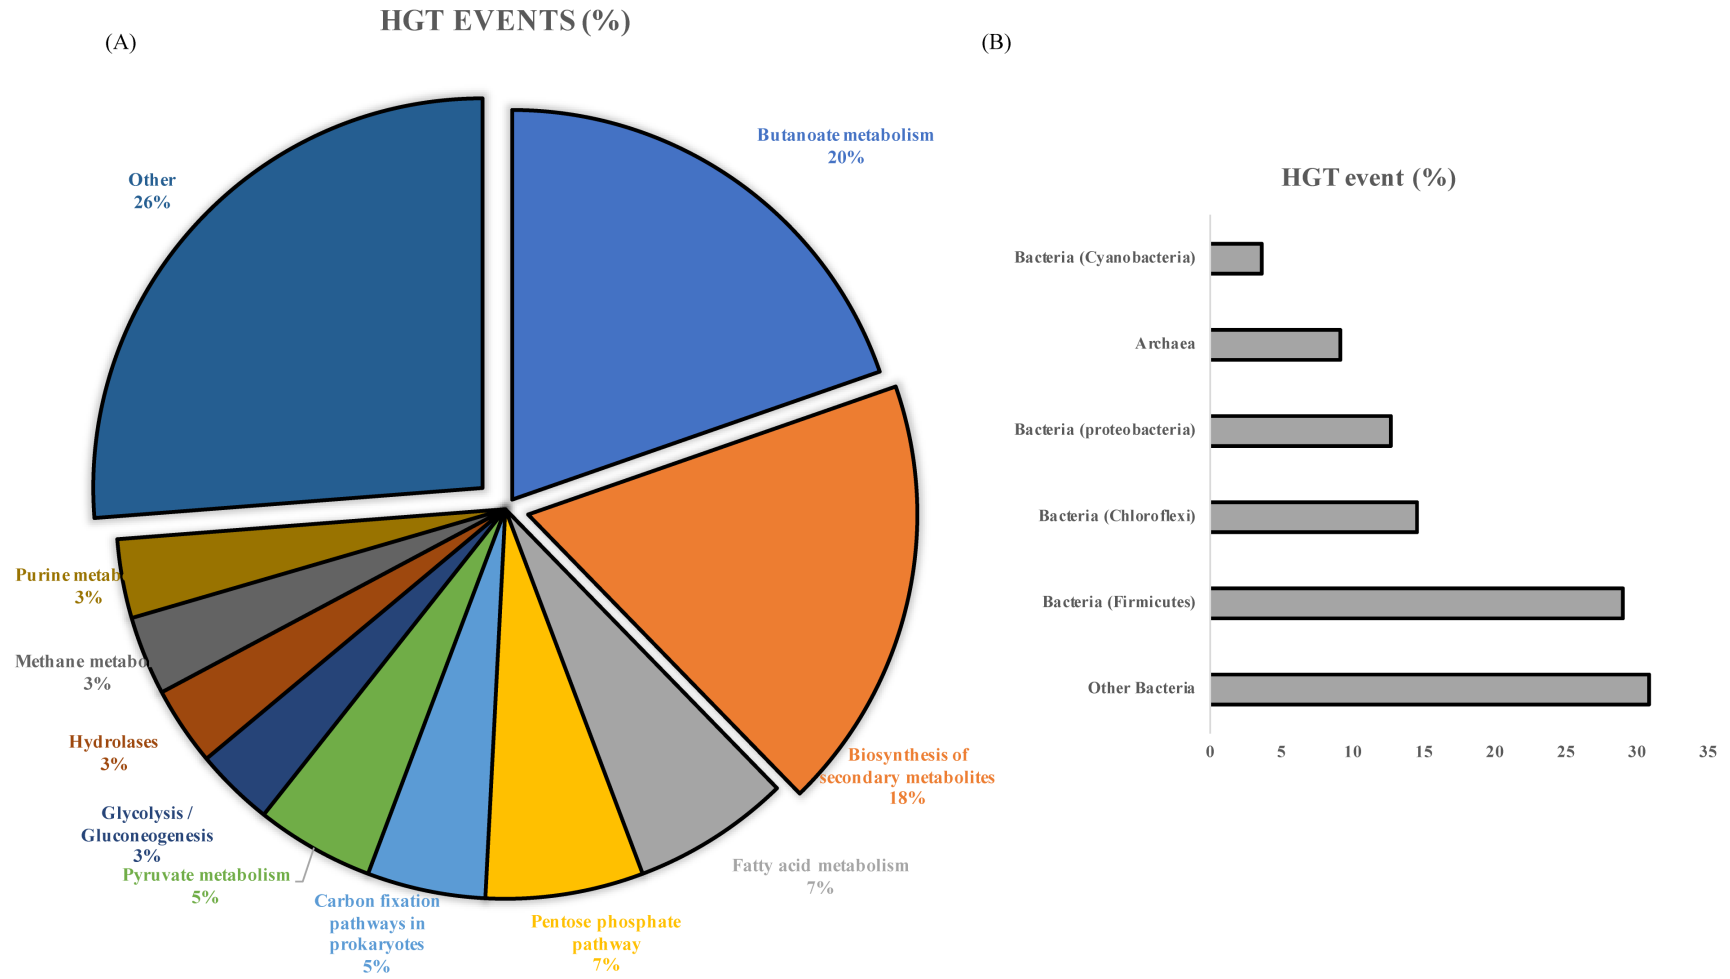

**Figure 4. Summary of HGT events detected in the Sifarchaeota MAGs.** (A) Different functional modules of horizontally transferred genes. (B) Major donors of the horizontally transferred genes.

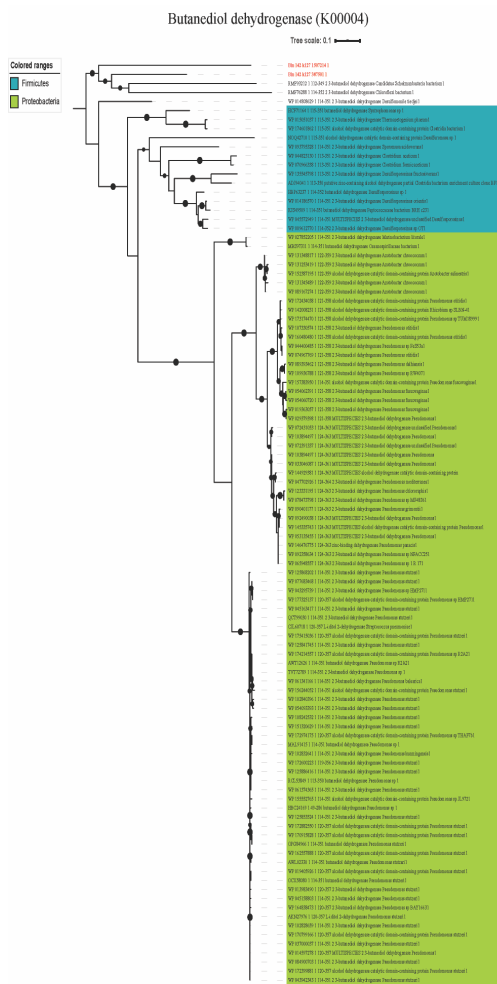

(A) Lineage specific

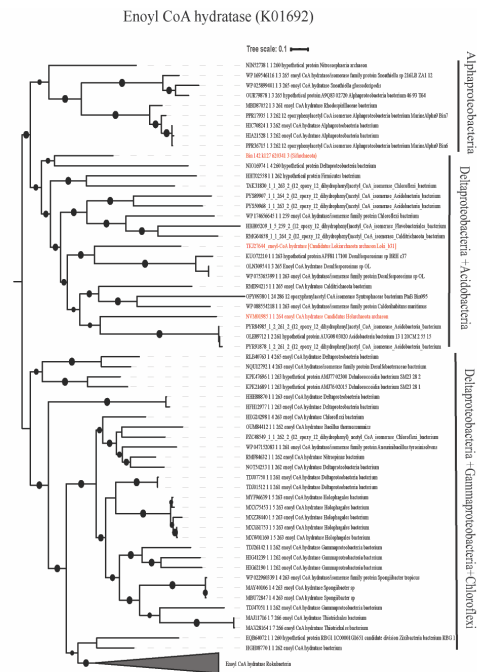

(B) Phylum specific

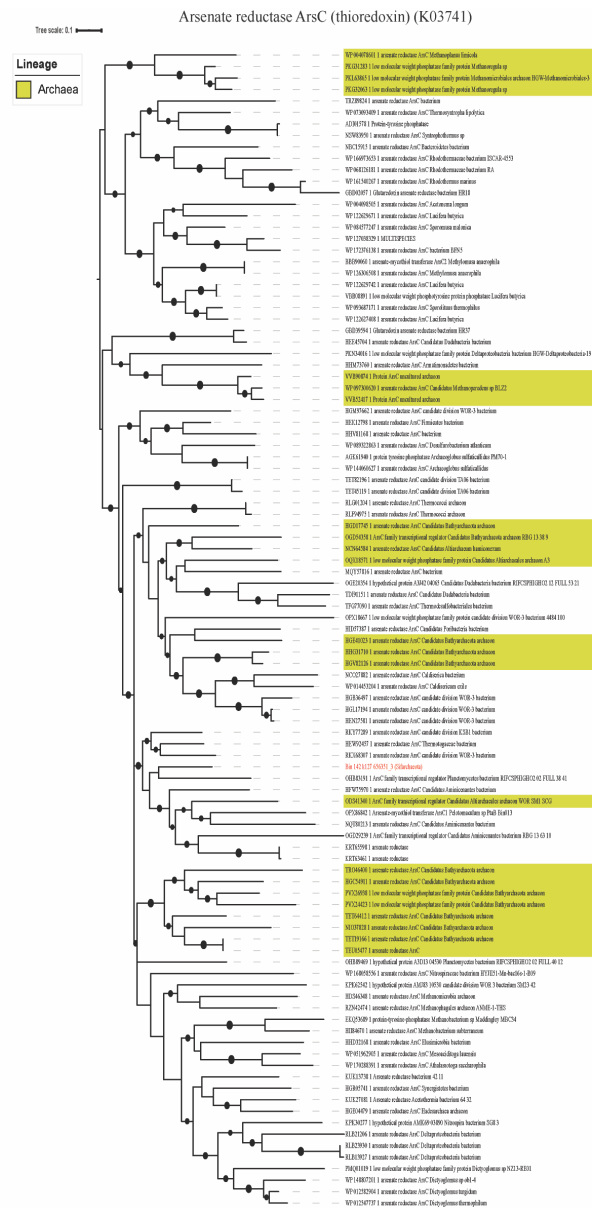

(C) Domain wide event

**Figure 5. Examples for horizontally transferred genes in Sifarchaeota MAGs.** (A) Lineage specific HGT event. Maximum likelihood phylogenetic tree of butanediol dehydrogenase gene sequences. Shaded areas correspond to the potential source organisms. The tree was constructed on the basis of butanediol dehydrogenase gene sequences using FastTree. Reference sequences were obtained using AnnoTree (K00004). (B) Phylum specific HGT event. Maximum likelihood phylogenetic tree of enoyl CoA hydratase gene sequences. The tree was constructed on the basis of enoyl CoA hydratase gene sequences using FastTree. Reference sequences were obtained using AnnoTree (K01692). (C) Domain wide HGT event. Maximum likelihood phylogenetic tree of arsenate reductase ArsC thioredoxin gene sequences. The tree was constructed on the basis of arsenate reductase ArsC thioredoxin gene sequences using FastTree. Reference sequences were obtained using AnnoTree (K03741).



**Table 1. Details of the Sifarchaeota MAGs analyzed in this study.**

| Bin ID    | Completion | Contamination | Genome Size (Mbps) | Estimated Genome Size (Mbps) | Strain heterogeneity | # contigs |
|-----------|------------|---------------|--------------------|------------------------------|----------------------|-----------|
| Bin.042_1 | 67.76      | 0.93          | 1.8                | 2.39                         | 0                    | 301       |
| Bin_190   | 74.4       | 1.9           | 1.9                | 2.38                         | 0                    | 786       |
| Bin_142   | 81.4       | 1.9           | 2.01               | 2.39                         | 0                    | 300       |

## References

1. Teske A, Sørensen KB. 2008. Uncultured archaea in deep marine subsurface sediments: have we caught them all? *ISME J* 2:3–18.
2. Solden L, Lloyd K, Wrighton K. 2016. The bright side of microbial dark matter: lessons learned from the uncultivated majority. *Curr Opin Microbiol* 31:217–226.
3. Spang A, Saw JH, Jørgensen SL, Zaremba-Niedzwiedzka K, Martijn J, Lind AE, van Eijk R, Schleper C, Guy L, Ettema TJG. 2015. Complex archaea that bridge the gap between prokaryotes and eukaryotes. *Nature* 521:173–179.
4. Zaremba-Niedzwiedzka K, Caceres EF, Saw JH, Bäckström D, Juzokaite L, Vancaester E, Seitz KW, Anantharaman K, Starnawski P, Kjeldsen KU, Stott MB, Nunoura T, Banfield JF, Schramm A, Baker BJ, Spang A, Ettema TJG. 2017. Asgard archaea illuminate the origin of eukaryotic cellular complexity. *Nature* 541:353–358.
5. Seitz KW, Dombrowski N, Eme L, Spang A, Lombard J, Sieber JR, Teske AP, Ettema TJG, Baker BJ. 2019. Asgard archaea capable of anaerobic hydrocarbon cycling. *Nat Commun* 10:1822.
6. Cai M, Liu Y, Yin X, Zhou Z, Friedrich MW, Richter-Heitmann T, Nimzyk R, Kulkarni A, Wang X, Li W, Pan J, Yang Y, Gu J-D, Li M. 2020. Diverse Asgard archaea including the novel phylum Gerdarchaeota participate in organic matter degradation. *Sci China Life Sci* 63:886–897.

7. Amanda Martino, Matthew E. Rhodes, Rosa León-Zayas, Isabella E. Valente, Jennifer F. Biddle and Christopher H. House. 2019. Microbial Diversity in Sub-Sea-floor Sediments from the Costa Rica Margin. *Geosciences* 9:218.
8. Farag IF, Biddle JF, Zhao R, Martino AJ, House CH, León-Zayas RI. 2020. Metabolic potentials of archaeal lineages resolved from metagenomes of deep Costa Rica sediments. *ISME J* 14:1345–1358.
9. Vannucchi, P.; Ujiie, K.; Stroncik, N.; IODP Exp. 334 Scientific Party; Yatheesh, V. 2013. IODP expedition 334: An investigation of the sedimentary record, fluid flow and state of stress on top of the seismogenic zone of an erosive subduction margin. *Scientific Drilling* vol.15:23–30.
10. Bolger AM, Lohse M, Usadel B. 2014. Trimmomatic: a flexible trimmer for Illumina sequence data. *Bioinformatics* 30:2114–2120.
11. Li D, Liu C-M, Luo R, Sadakane K, Lam T-W. 2015. MEGAHIT: an ultra-fast single-node solution for large and complex metagenomics assembly via succinct de Bruijn graph. *Bioinformatics* 31:1674–1676.
12. Wu Y-W, Tang Y-H, Tringe SG, Simmons BA, Singer SW. 2014. MaxBin: an automated binning method to recover individual genomes from metagenomes using an expectation-maximization algorithm. *Microbiome* 2:26.
13. Kang DD, Li F, Kirton E, Thomas A, Egan R, An H, Wang Z. 2019. MetaBAT 2: an adaptive binning algorithm for robust and efficient genome reconstruction from metagenome assemblies. *PeerJ* 7:e7359.

14. Sieber CMK, Probst AJ, Sharrar A, Thomas BC, Hess M, Tringe SG, Banfield JF. 2018. Recovery of genomes from metagenomes via a dereplication, aggregation and scoring strategy. *Nat Microbiol* 3:836–843.
15. Parks DH, Imelfort M, Skennerton CT, Hugenholtz P, Tyson GW. 2015. CheckM: assessing the quality of microbial genomes recovered from isolates, single cells, and metagenomes. *Genome Res* 25:1043–1055.
16. Chaumeil P-A, Mussig AJ, Hugenholtz P, Parks DH. 2019. GTDB-Tk: a toolkit to classify genomes with the Genome Taxonomy Database. *Bioinformatics* <https://doi.org/10.1093/bioinformatics/btz848>.
17. Seah BKB, Gruber-Vodicka HR. 2015. gbtools: Interactive Visualization of Metagenome Bins in R. *Frontiers in Microbiology* 6:1451.
18. Bushnell B. 2014. BBMap: A Fast, Accurate, Splice-Aware Aligner.
19. Kumar S, Jones M, Koutsovoulos G, Clarke M, Blaxter M. 2013. Blobology: exploring raw genome data for contaminants, symbionts and parasites using taxon-annotated GC-coverage plots. *Frontiers in Genetics* 4:237.
20. Quast C, Pruesse E, Yilmaz P, Gerken J, Schweer T, Yarza P, Peplies J, Glöckner FO. 2013. The SILVA ribosomal RNA gene database project: improved data processing and web-based tools. *Nucleic Acids Res* 41:D590-596.
21. Bankevich A, Nurk S, Antipov D, Gurevich AA, Dvorkin M, Kulikov AS, Lesin VM, Nikolenko SI, Pham S, Prjibelski AD, Pyshkin AV, Sirotkin AV, Vyahhi N, Tesler G,

- Alekseyev MA, Pevzner PA. 2012. SPAdes: a new genome assembly algorithm and its applications to single-cell sequencing. *J Comput Biol* 19:455–477.
22. Parks DH, Chuvochina M, Waite DW, Rinke C, Skarszewski A, Chaumeil P-A, Hugenholtz P. 2018. A standardized bacterial taxonomy based on genome phylogeny substantially revises the tree of life. *Nature Biotechnology* 36:996–1004.
23. Eren AM, Esen ÖC, Quince C, Vineis JH, Morrison HG, Sogin ML, Delmont TO. 2015. Anvi'o: an advanced analysis and visualization platform for 'omics data. *PeerJ* 3:e1319.
24. Edgar RC. 2004. MUSCLE: multiple sequence alignment with high accuracy and high throughput. *Nucleic Acids Res* 32:1792–1797.
25. Nguyen L-T, Schmidt HA, von Haeseler A, Minh BQ. 2015. IQ-TREE: a fast and effective stochastic algorithm for estimating maximum-likelihood phylogenies. *Mol Biol Evol* 32:268–274.
26. Miller MA, Pfeiffer W, Schwartz T. 2010. Creating the CIPRES Science Gateway for inference of large phylogenetic trees. 2010 Gateway Computing Environments Workshop (GCE) 1–8.
27. Kalyaanamoorthy S, Minh BQ, Wong TKF, von Haeseler A, Jermin LS. 2017. ModelFinder: fast model selection for accurate phylogenetic estimates. *Nat Methods* 14:587–589.
28. Hoang DT, Chernomor O, von Haeseler A, Minh BQ, Vinh LS. 2018. UFBoot2: Improving the Ultrafast Bootstrap Approximation. *Mol Biol Evol* 35:518–522.

29. Jain C, Rodriguez-R LM, Phillippy AM, Konstantinidis KT, Aluru S. 2018. High throughput ANI analysis of 90K prokaryotic genomes reveals clear species boundaries. *Nat Commun* 9:5114.
30. Hyatt D, Chen G-L, Locascio PF, Land ML, Larimer FW, Hauser LJ. 2010. Prodigal: prokaryotic gene recognition and translation initiation site identification. *BMC Bioinformatics* 11:119.
31. Johnson LS, Eddy SR, Portugaly E. 2010. Hidden Markov model speed heuristic and iterative HMM search procedure. *BMC Bioinformatics* 11:431.
32. Beckmann S, Farag IF, Zhao R, Christman GD, Prouty NG, Biddle JF. 2020. Evidence for an expanded repertoire of electron acceptors for the anaerobic oxidation of methane in authigenic carbonates in the Atlantic and Pacific Ocean. preprint, *Microbiology*.
33. Kanehisa M, Sato Y, Morishima K. 2016. BlastKOALA and GhostKOALA: KEGG Tools for Functional Characterization of Genome and Metagenome Sequences. *J Mol Biol* 428:726–731.
34. Yin Y, Mao X, Yang J, Chen X, Mao F, Xu Y. 2012. dbCAN: a web resource for automated carbohydrate-active enzyme annotation. *Nucleic Acids Res* 40:W445-451.
35. Edgar RC. 2010. Search and clustering orders of magnitude faster than BLAST. *Bioinformatics* 26:2460–2461.

36. Rawlings ND, Barrett AJ, Thomas PD, Huang X, Bateman A, Finn RD. 2018. The MEROPS database of proteolytic enzymes, their substrates and inhibitors in 2017 and a comparison with peptidases in the PANTHER database. *Nucleic Acids Res* 46:D624–D632.
37. Saier MH, Reddy VS, Tsu BV, Ahmed MS, Li C, Moreno-Hagelsieb G. 2016. The Transporter Classification Database (TCDB): recent advances. *Nucleic Acids Res* 44:D372-379.
38. Aramaki T, Blanc-Mathieu R, Endo H, Ohkubo K, Kanehisa M, Goto S, Ogata H. 2020. KofamKOALA: KEGG Ortholog assignment based on profile HMM and adaptive score threshold. *Bioinformatics* 36:2251–2252.
39. Fernandez NF, Gundersen GW, Rahman A, Grimes ML, Rikova K, Hornbeck P, Ma'ayan A. 2017. Clustergrammer, a web-based heatmap visualization and analysis tool for high-dimensional biological data. *Sci Data* 4:170151.
40. Mendler K, Chen H, Parks DH, Lobb B, Hug LA, Doxey AC. 2019. AnnoTree: visualization and exploration of a functionally annotated microbial tree of life. *Nucleic Acids Res* 47:4442–4448.
41. Price MN, Dehal PS, Arkin AP. 2010. FastTree 2--approximately maximum-likelihood trees for large alignments. *PLoS ONE* 5:e9490.
42. MacLeod F, Kindler GS, Wong HL, Chen R, Burns BP. 2019. Asgard archaea: Diversity, function, and evolutionary implications in a range of microbiomes. *AIMS microbiology* 5:48–61.

43. Anda VD, Chen L-X, Dombrowski N, Hua Z, Jiang H-C, Banfield J, Li W-J, Baker B. 2020.

Brockarchaeota, a novel archaeal lineage capable of methylotrophy. preprint, In Review.



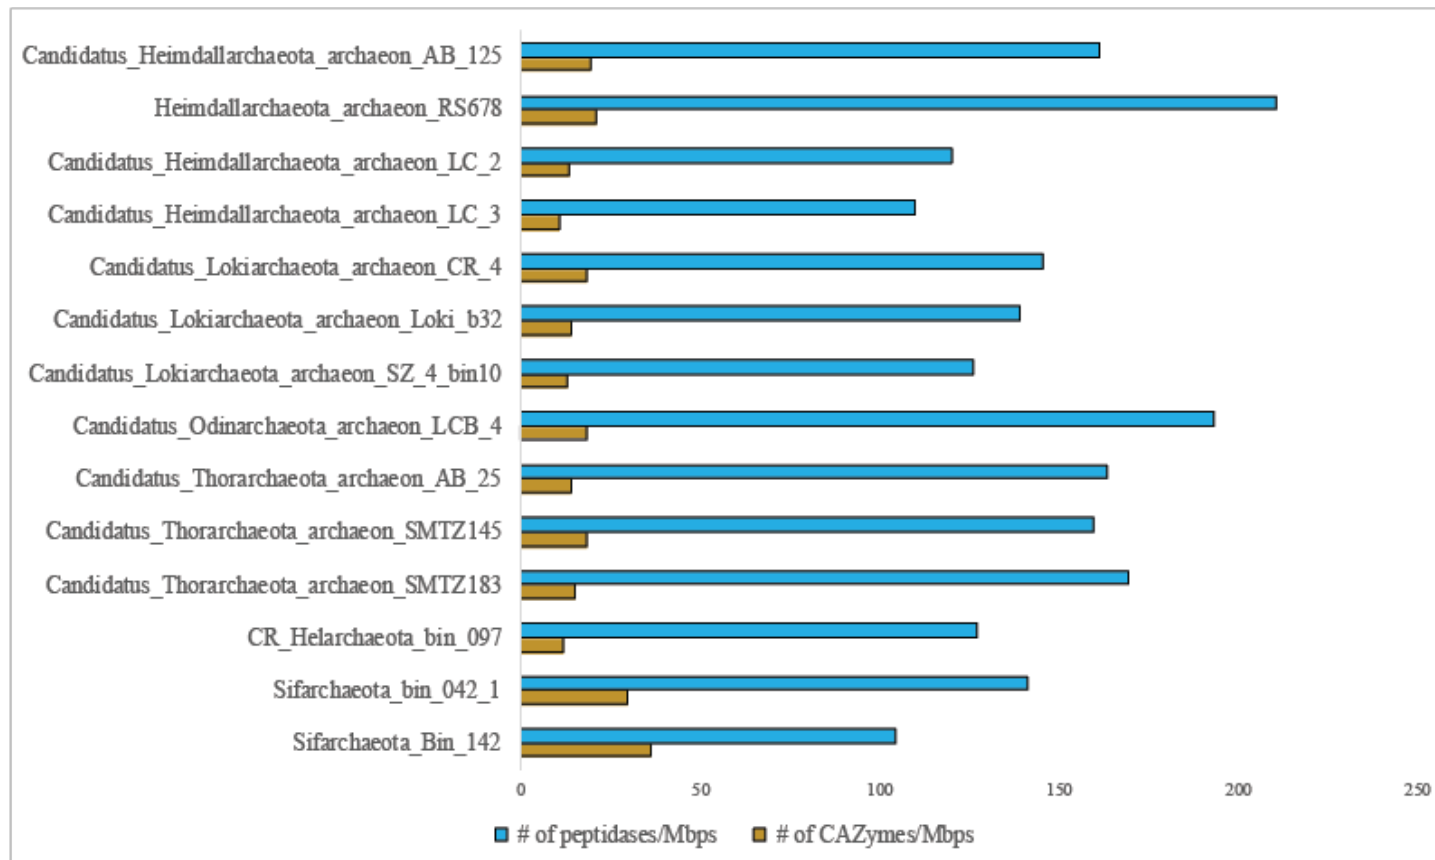

**Supplementary Figure 1.** Relative densities (numbers per 1 Mb) of peptidases and CAZymes encoded by the different Asgard MAGs.

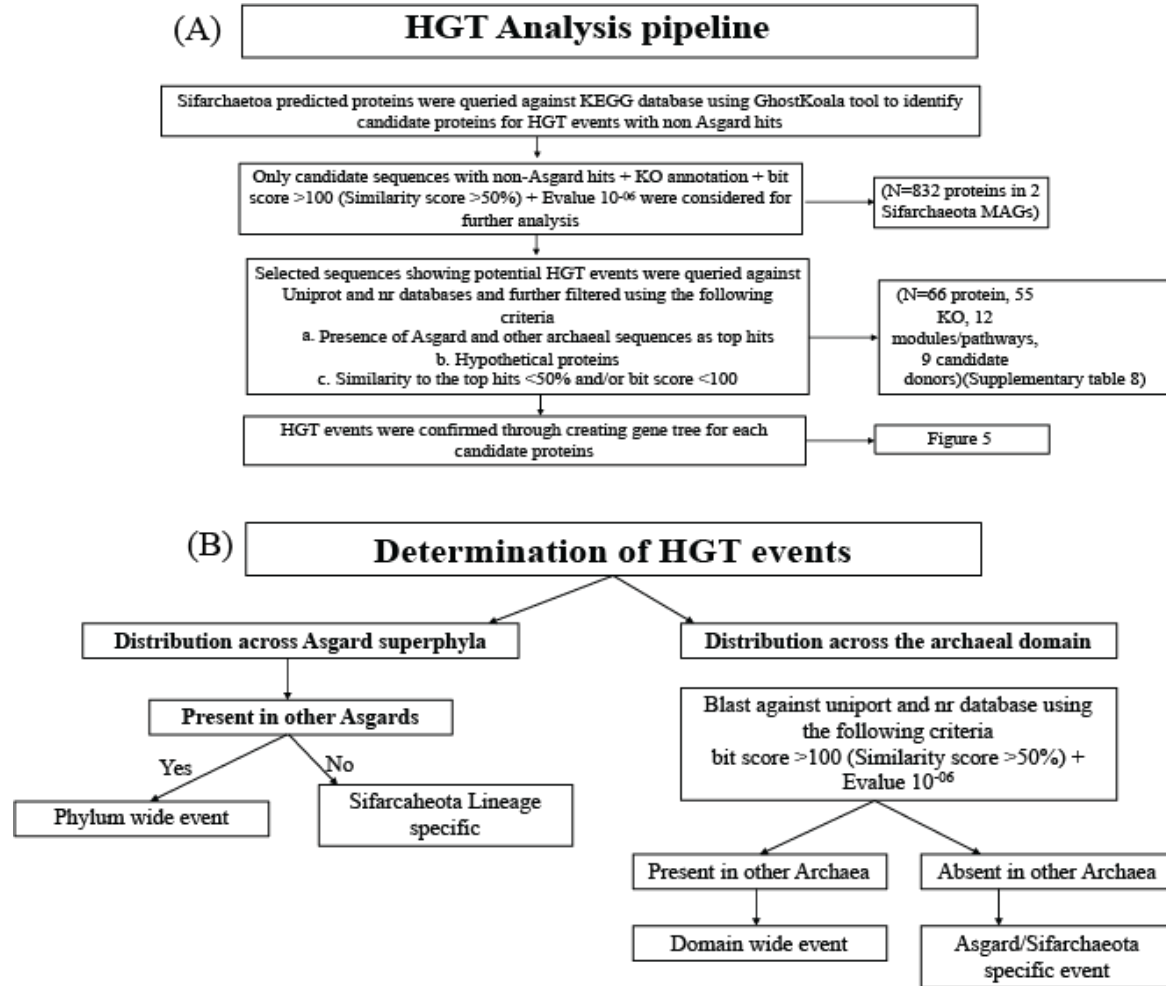

**Supplementary Figure 2.** Workflow diagram describes the steps followed to identify HGT events in Sifarchaeota MAGs.
